# Supplementary material for: Plasmodium berghei-Mediated NRF2 Activation in Infected Hepatocytes Enhances Parasite Survival
Source: Hindawi journal article supplement (doi:10.1155/2022/7647976), 2022-03-12
Supplement: f1 [file 7647976.f1.docx]

**Supplementary Figures**


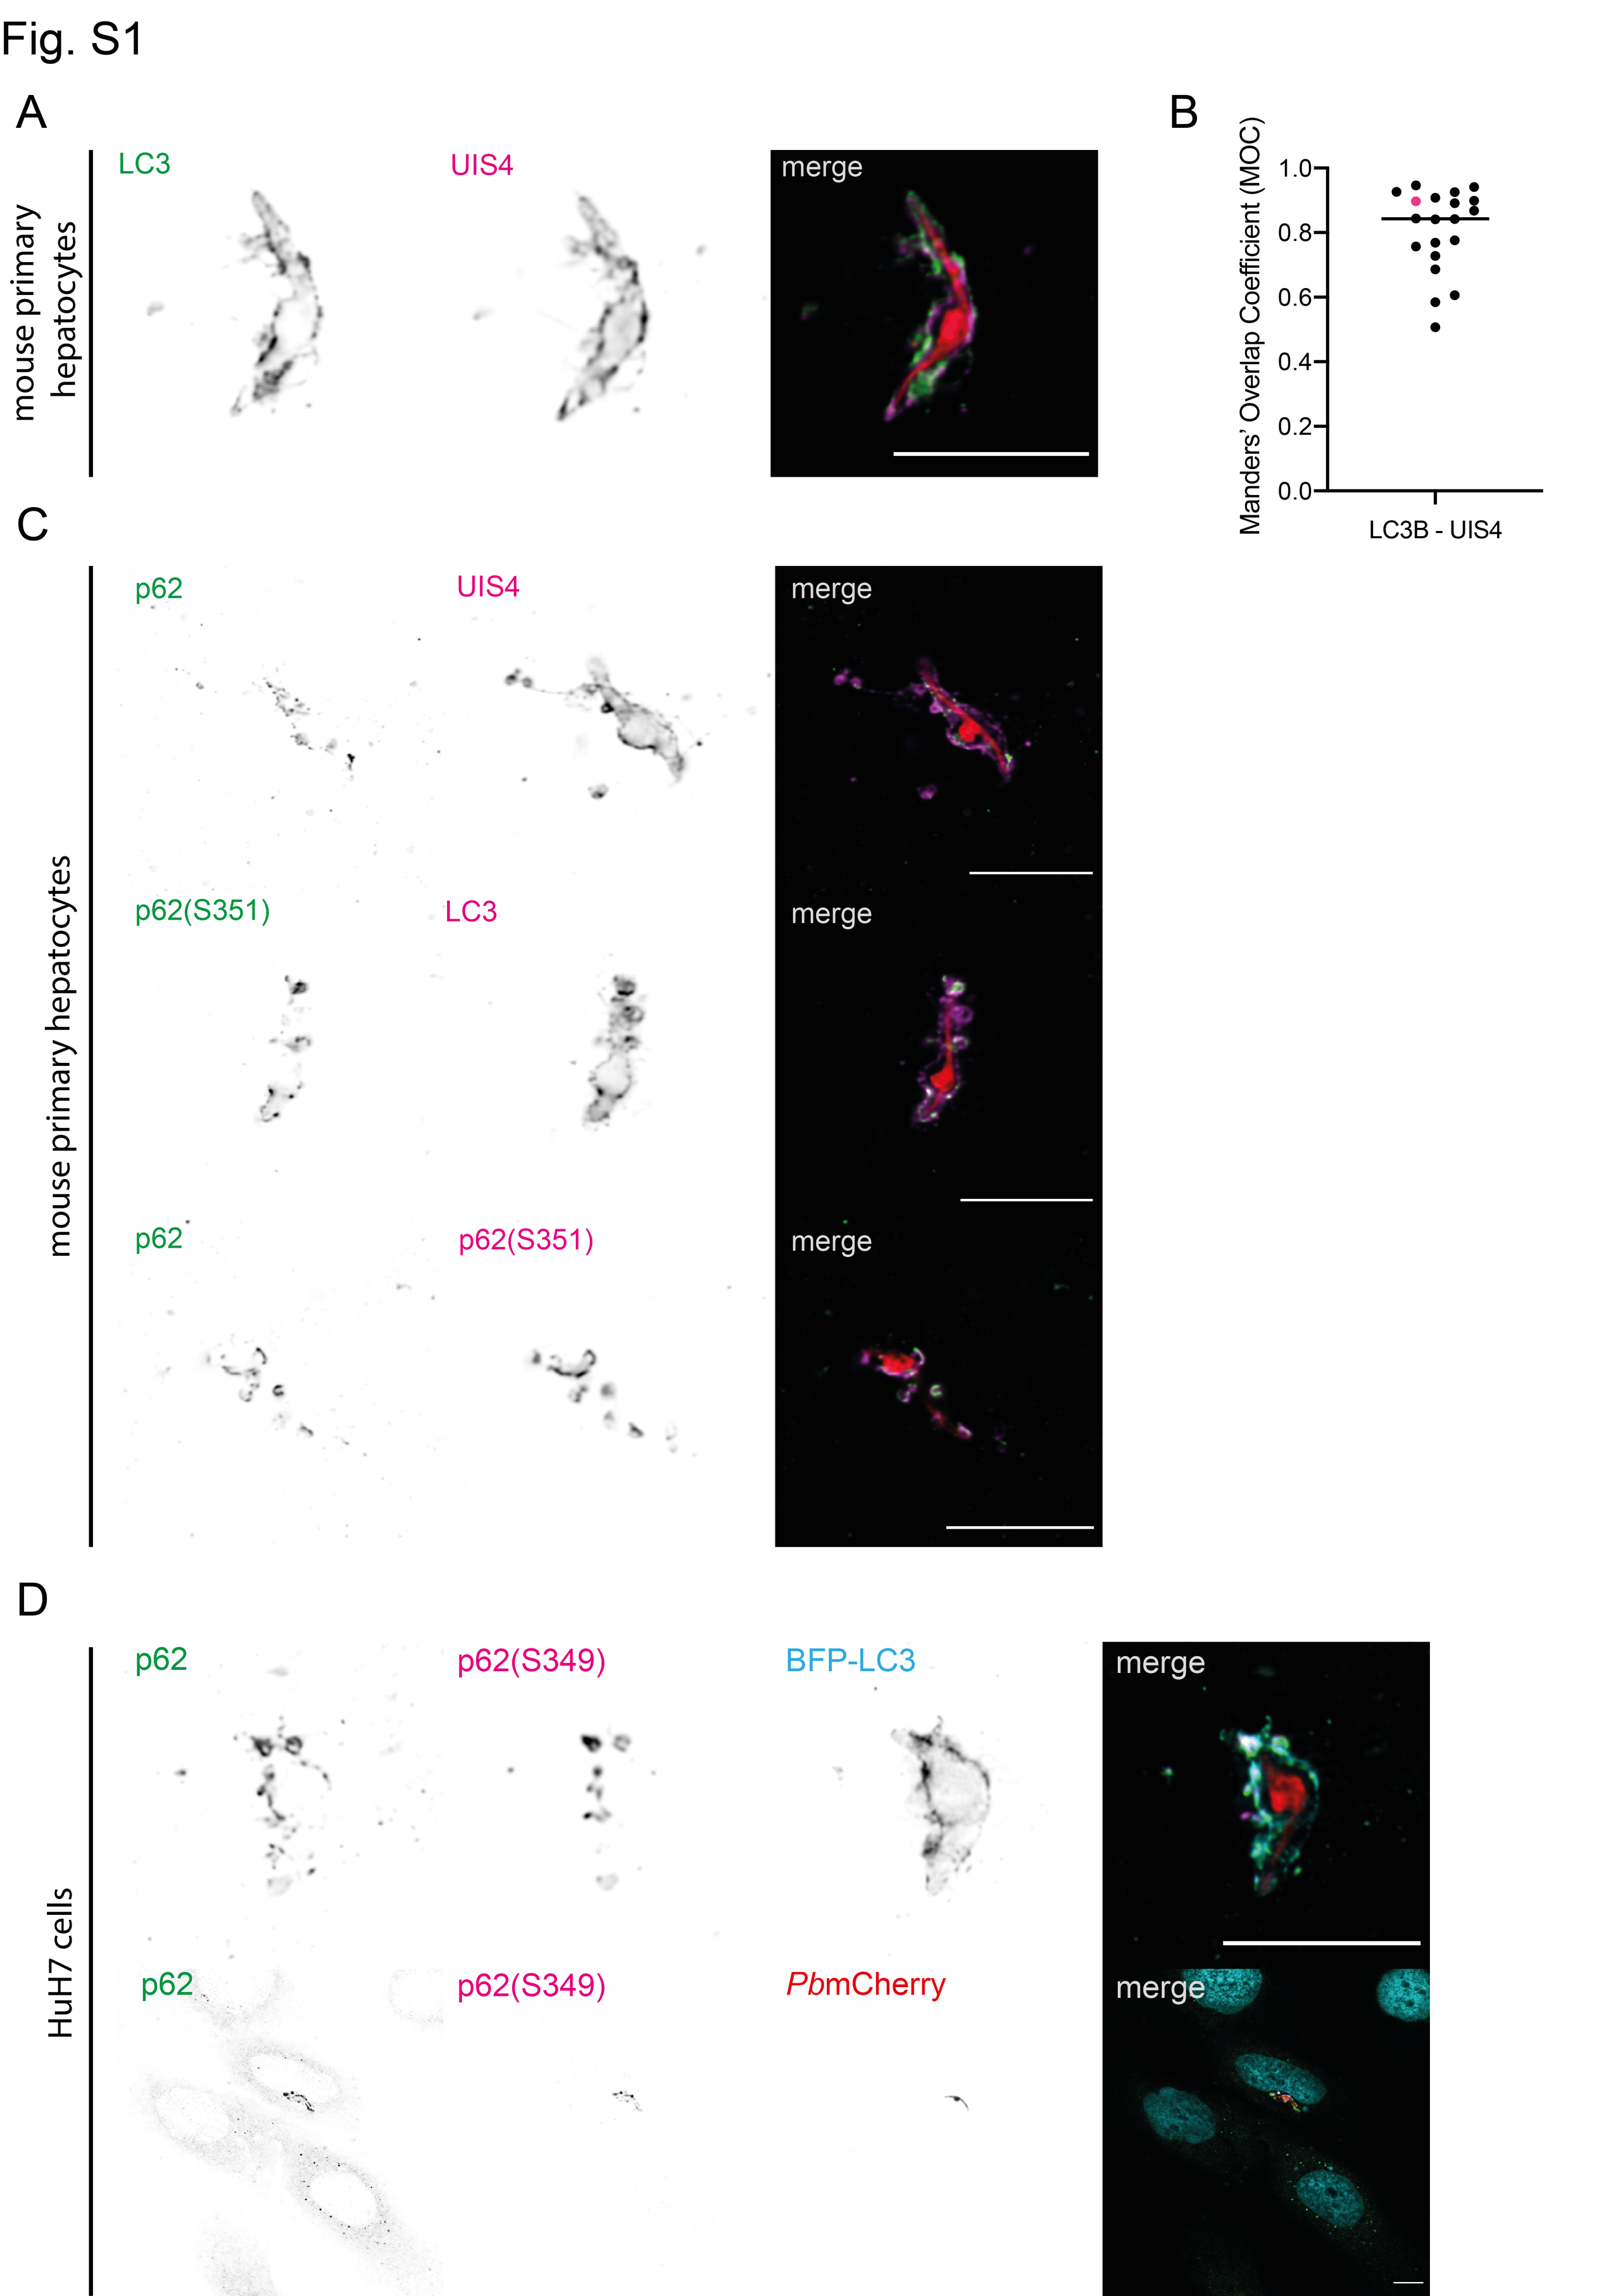


**Figure S1:** **(A)** LC3 colocalizes with UIS4 in *P. berghei* infected mouse primary hepatocytes. Mouse primary hepatocytes were isolated and infected with *Pb*mCherry (red). Cells were fixed at 6 hpi and stained with antibodies against LC3B (green) and UIS4 (magenta). Imaging was performed on a confocal laser scanning microscope. Images were deconvolved using Huygens Professional software. Scale bar: 10µm. **(B)** Quantification of (A). The Manders’ Overlap Coefficient of 20 images was calculated using FIJI. Every parasite analyzed is represented by one dot. The pink dot represents the parasite depicted in (A). **(C)** Additional representative images of the data displayed in figure 3 A&B. Primary mouse hepatocytes were infected with *Pb*mCherry parasites (red). 6 hpi, cells were fixed and stained with either anti-UIS4 (magenta; upper panel) or anti-LC3 antibodies (magenta; middle panel) to visualize the PVM. p62 was stained using an anti-p62 antibody or an antibody specifically recognizing p62 phosphorylated at serine 351. Images were taken at a confocal laser scanning microscope and deconvolved using Huygens Professional. Scale bar: 10µm. Note that p62 localizes to the PVM and is phosphorylated at S351. **(D)** P62 at the PVM is phosphorylated at Ser349 in HuH7 cells. HuH7 cells were infected with *Pb*mCherry (red). Cells were fixed at 6 hpi and stained with antibodies against p62 (green) and an antibody specifically recognizing p62 phosphorylated at serine 349 (magenta). The PVM was visualized by transient transfection of BFP-LC3 (cyan; upper panel). DNA was visualized using Dapi (cyan; lower panel). Scale bar: 10µm. Note that in non-infected cells there is nearly no phosphorylated p62.


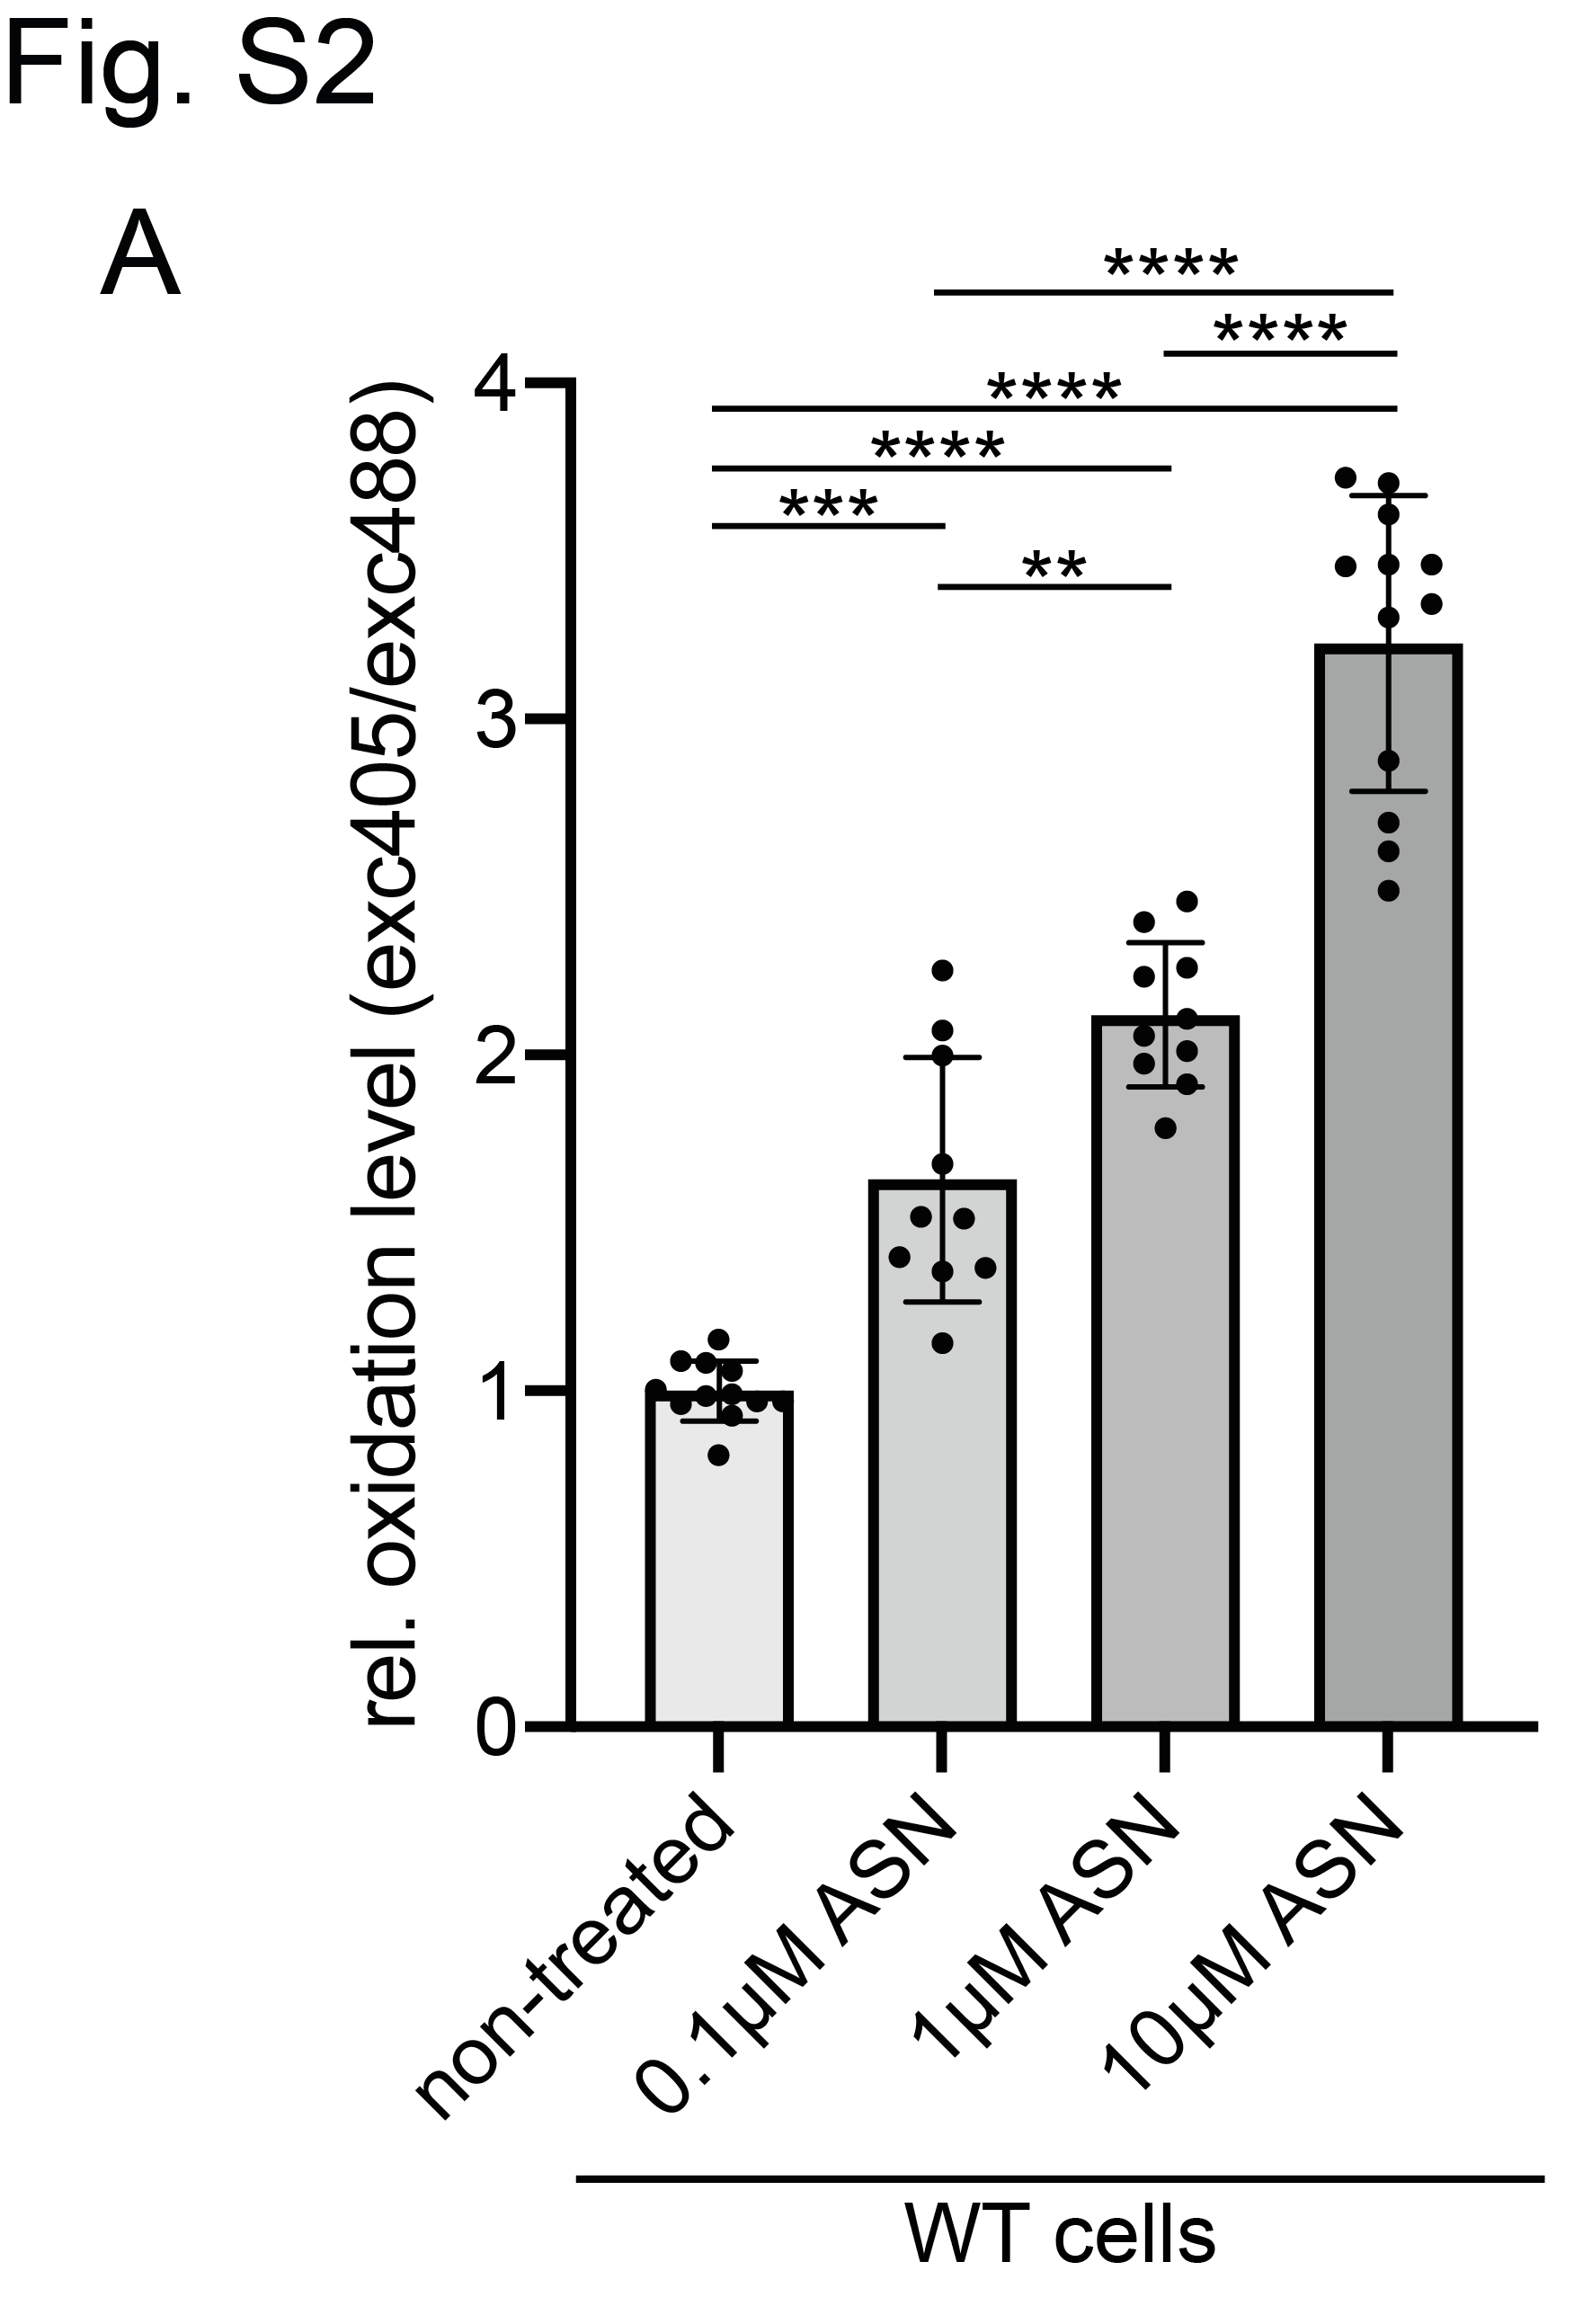


**Figure S2:** HuH7 WT cells stably expressing roGFP2 in the cytoplasm were treated with different concentrations of ASN to induce oxidative stress. Single cells were imaged once with excitation 405nm and once with excitation 488nm with the same detection range of 500 nm to 550nm. Signal intensities for both excitation wavelengths were measured using FIJI. The graph depicts the ratio of both signal intensities which each dot representing one single cell. N = 10-12 per condition. Graph shows mean and SD. P-values were calculated using a one-way ANOVA test followed by Tukey’s post hoc test (**: p≤0.01; ***: p≤0.001; ****: p≤0.0001).


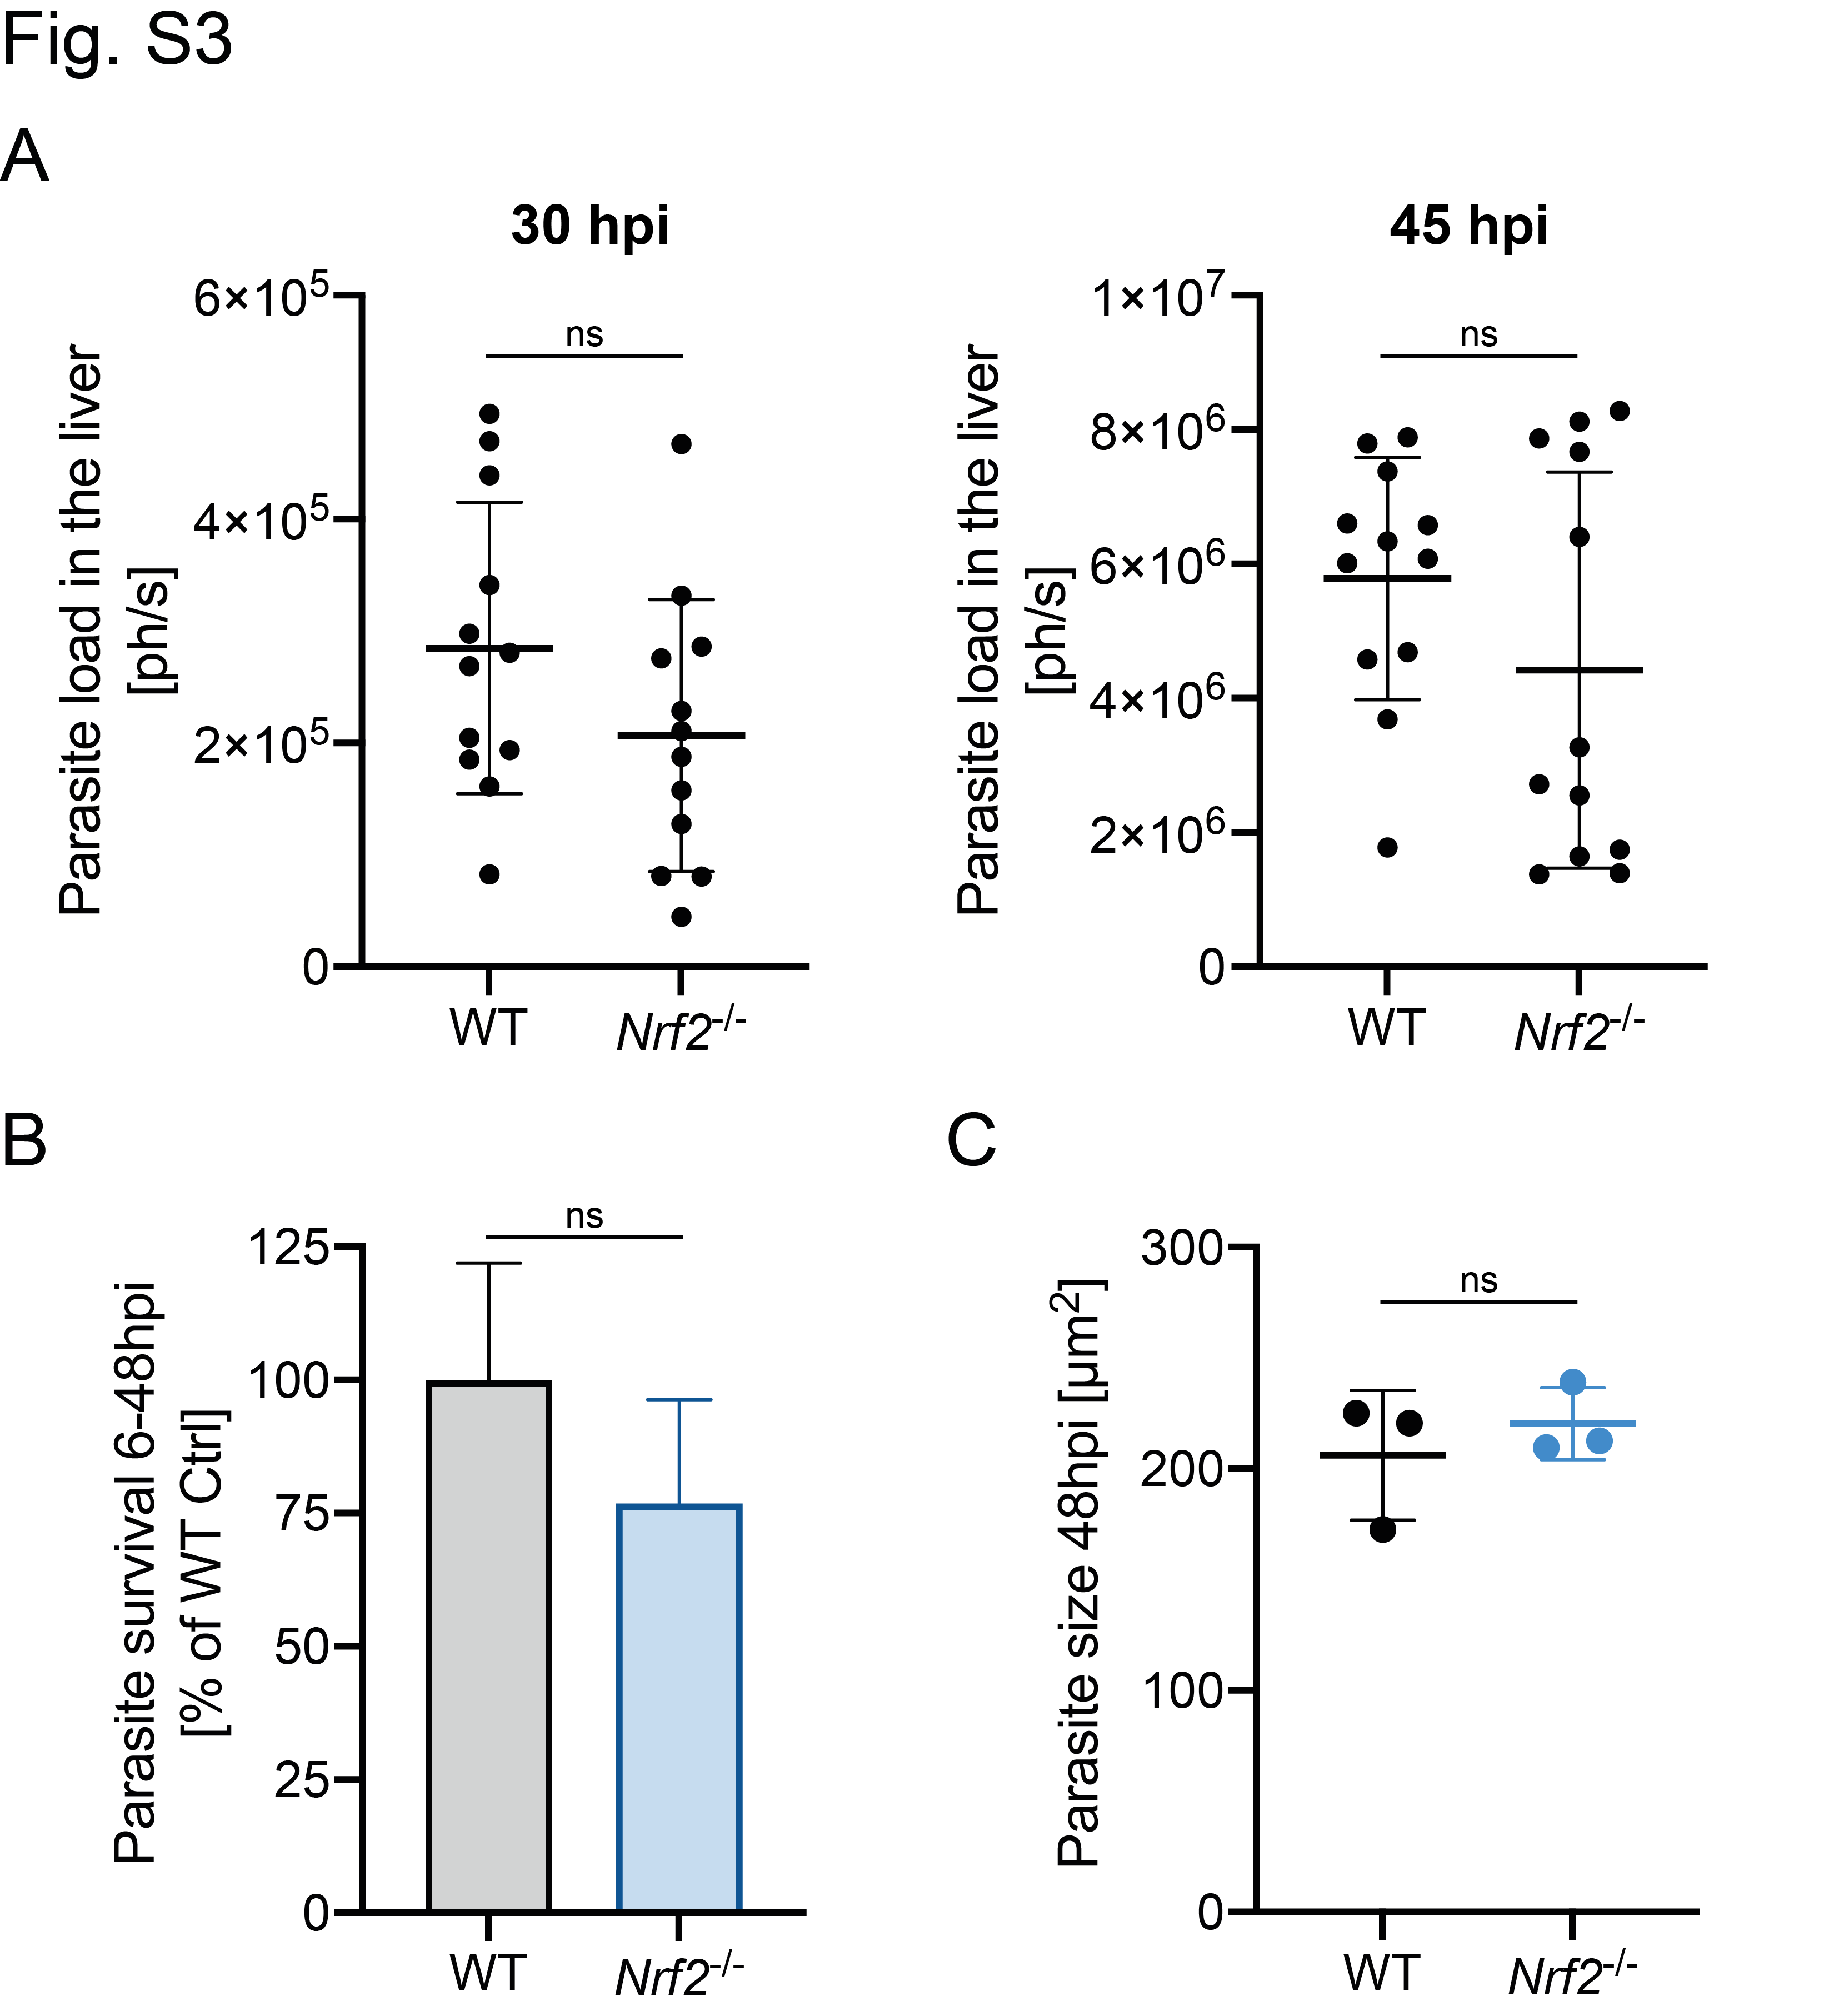


**Figure S3: (A)** Parasite load in the liver of *Nrf2*-/- mice is not significantly lowered. WT and *Nrf2*-/- mice were injected intravenously with 50’000 *P. berghei* sporozoites constitutively expressing luciferase (*Pb*mCherryhsp70-Luceef1α;(Prado et al., 2015). At 30 and 45 hpi the mice were anesthetized, injected with luciferin and parasite load in the liver was analyzed using and In Vivo Imaging System (IVIS). The graphs show total photons per second with each dot representing one mouse. N = 12 per group out of 3 experiments. Mean and SD are depicted. P-values were determined using a Student’s t-test (ns: p>0.05). **(B)** Primary hepatocytes isolated from WT or *Nrf2*-/- mice were infected with *Pb*mCherry sporozoites. Parasite numbers were evaluated at 6 and 48 hpi using automated high throughput live cell imaging and analysis (InCell Analyzer 2000). The graph shows the relative parasite survival from 6 to 48 hpi compared to the WT situation. Mean and SD of three independent experiments are depicted. N > 2500 parasites per cell line and experiment. A Student’s t-test was used to determine p values (ns: p>0.05). **(C)** Parasite size at 48 hpi of the experiment described in (B). The graph shows the medians in parasite size of 3 experiments. Mean and SD are depicted. N > 1000 parasites per cell line and experiment. p-values were determined using a Student’s t-test (ns: p>0.05).
